# Supplementary material
Source: publisher figshare collection journal article supplement (https://karger.figshare.com/ndownloader/files/23234765)
Supplement: Supplementary file 1 [file 23234765]

## Table S3: Results of the simple linear regression analysis and Spearman´s rank correlation, respectively, of gluteal PDFF and FT3, FT4 and TSH. Each analysis was carried out for the entire group, the high delta PDFF group (delta PDFF ≥ 12%) and low delta PDFF group (delta PDFF < 12 %). Analyses for associations between delta PDFF and FT3, FT4 and TSH are shown in the far right column. PDFF: proton density fat fraction, FT3: free triiodothyronine, FT4: free thyroxine, TSH: thyroid stimulating hormone

|  | **PDFF gluteal** | | | **Delta PDFF** |
| --- | --- | --- | --- | --- |
| **All subjects** | **High delta PDFF group** | **Low delta PDFF group** |  |
| **FT3** | R² = 0.001, p = 0.72 | R² = 0.07, p = 0.06 | R² = 0.02, p = 0.40 | R² = 0.005, p = 0.51 |
| **FT4** | R² = 0.01, p = 0.3 | R² = 0.06, p = 0.08 | R²< 0.001, p = 0.99 | R² = 0.002, p = 0.67 |
| **TSH** | rho = 0.06, p = 0.55 | rho = 0.11, p = 0.42 | rho = -0.01, p= 0.94 | rho = 0.16, p = 0.11 |
